# Supplementary material for: Facile and sensitive detection of clenbuterol in pork using a personal glucose meter
Source: Royal Society of Chemistry journal article supplement (doi:10.1039/c7ay01826f), 2017-01-01
Supplement: c7ay01826f1.pdf [file c7ay01826f1.pdf]

## Supplementary Content

Table S1 The statistical data from different storage time

| Spiked        |                        |                                |       |      |      |      | <i>p</i> -value   |
|---------------|------------------------|--------------------------------|-------|------|------|------|-------------------|
| Concentration |                        | Measured Concentration (ng/mL) |       |      |      |      | ( $\alpha=0.01$ ) |
| (ng/mL)       |                        |                                |       |      |      |      |                   |
| 0.5           | Freshly prepared       | 0.42                           | 0.38  | 0.45 | 0.43 | 0.46 | 0.82              |
|               | Stored for three weeks | 0.47                           | 0.49  | 0.53 | 0.51 | 0.42 |                   |
| 5             | Freshly prepared       | 4.65                           | 4.59  | 4.72 | 4.86 | 4.74 | 0.99              |
|               | Stored for three weeks | 5.12                           | 4.97  | 5.05 | 4.86 | 5.06 |                   |
| 10            | Freshly prepared       | 9.12                           | 8.29  | 8.57 | 8.63 | 8.48 | 0.93              |
|               | Stored for three weeks | 10.32                          | 10.41 | 9.87 | 9.96 | 9.21 |                   |
